# Supplementary material
Source: PubMed Central journal article supplement (PMC3557055)
Supplement: 1207518110_pnas.201207518SI.pdf [file 1207518110_pnas.201207518SI.pdf]

# Supporting Information

Simon et al. 10.1073/pnas.1207518110

## SI Materials and Methods

**Protein Production.** Residues 1–78 of Sgt2 (Sgt2<sub>NT</sub>) and 70–152 of Get5 (Get5<sub>UBL</sub>) from *S. cerevisiae* and 1–74 of human Ubl4a were amplified from plasmids using the following primers:

```
gacgacgacaagatgtcagcatcaaaagaagaattgtgcc;
gaggagaagcccggttacgattctggaactcttgacgcagaat;
gacgacgacaagatggacaacgccgccgtccactta;
gaggagaagcccggttacggattcggcttaacatcatgactgtgat;
gacgacgacaagatgcagctgacggggaaggcg; and
gaggagaagcccggttacaggggttgaccactaggttg.
```

They were inserted via ligation-independent Ek/LIC cloning into pET-46 vectors. Site-directed mutagenesis was performed using QuikChange (Stratagene).

**NMR Structure Determination of the Sgt2<sub>NT</sub> Dimer in the Free State.** NMR structure determination of free Sgt2<sub>NT</sub> dimer performed with ARIA2.1 (1) using a protocol adapted from that previously reported for a homodimeric system (2). Comparison of the 3D, <sup>13</sup>C-separated, (<sup>13</sup>C, <sup>15</sup>N-*FI*)–reject filtered NOESY experiment (3) with the 3D <sup>13</sup>C-separated NOESY-HMQC permitted NOEs to be assigned as intra- or intermolecular, whereas those observed in the 3D <sup>15</sup>N-separated NOESY were allowed to be either. NOE restraints were applied to one monomer only, with the second monomer being refined under noncrystallographic symmetry restraints.

TALOS-derived dihedrals and hydrogen bonds in regions of regular secondary structure based on amide exchange rates and initial structures were applied to both monomers. Specific differences from the above-reported protocol were as follows: high temperature, first cooling, and second cooling refine steps: 15,000, 10,000, and 20,000, respectively; dihedral force constants (high temperature, cool 1, and cool 2 stages): 15, 40, and 300 Kcal/mol; noncrystallographic symmetry restraints force constant: 100 Kcal/mol. Packing to ensure retention of monomer proximity was used throughout, with packing force constants of 15, 10, and 5 Kcal/mol for the high temperature, first cooling, and second cooling steps, respectively. Network anchoring with default parameters was used in iterations 0–4. The final ensemble comprised 100 structures from which the lowest energy 20 were subjected to water refinement.

**Structure Calculation for Sgt2<sub>NT</sub>/Get5<sub>UBL</sub> Complex.** The chemical shift perturbation studies delineated clear interaction surface areas in the Sgt2<sub>NT</sub>/Get5<sub>UBL</sub> complex. These data in concert with several measured assignable intercomplex NOEs made this complex highly suitable for structure calculation using the HADDOCK approach. For the calculation, the crystal structure of Get5<sub>UBL</sub> and the lowest energy NMR structure from the family of Sgt2<sub>NT</sub> dimer structures were used. Ambiguous Interaction Restraints were implemented according to the standard protocol; specifically, from the chemical shift perturbation, 27 amino acid residues in Sgt2<sub>NT</sub> and 31 in Get5<sub>UBL</sub> were identified to have weighted chemical shift changes significantly greater than the average: 0.201 ppm for Sgt2<sub>NT</sub> and 0.577 ppm for Get5<sub>UBL</sub> were chosen as suitable cutoff values. After filtering for a relative solvent accessibility greater than 50%, as calculated using the program Naccess, 12 residues in Sgt2<sub>NT</sub> (18, 40, 41, 42, 45, 48, 49, 52, 56, 63, 71, and 81) and 16 in Get5<sub>UBL</sub> (29, 33, 55, 61, 64, 68, 69, 70, 73, 75, 79, 82, 83, 89, 95, and 97) were identified as active residues. Residues juxtaposed to these that have a relative solvent accessibility greater than 50% were termed “passive residues.” These included nine further residues in Sgt2<sub>NT</sub> (14, 37, 41, 61, 62, 66, 67, 70, and 84) and 10 in Get5<sub>UBL</sub> (30, 31, 53, 54, 59, 77, 80, 84, 96, and 97). A number of intermolecular NOEs were identified from filtered NOESY experiments using two samples comprising either unlabeled Sgt2<sub>NT</sub> and <sup>15</sup>N <sup>13</sup>C-Get5<sub>UBL</sub> or vice versa. Due to differences in the free and bound state chemical shifts, only four of these could be assigned without a high degree of ambiguity and were included as explicit distance restraints to guide docking. Automatic selection of interfacial residues (i.e., those that are allowed to move during refinement) was invoked.

One thousand initial complex structures were generated by rigid body energy minimization, and the best 200 by total energy were selected for torsion angle dynamics and subsequent Cartesian dynamics in an explicit water solvent. Default scaling for energy terms was applied. Following the standard benchmarked protocol, cluster analysis of the water-refined structures yielded two clear ensembles with the lowest HADDOCK score. One of these could be discounted immediately due to violating the measured NOEs, leaving an ensemble of 13 structures. The 10 lowest energy structures from this were chosen to represent the complex and have been deposited under PDB accession no. 4ASW.

1. Rieping W, et al. (2007) ARIA2: Automated NOE assignment and data integration in NMR structure calculation. *Bioinformatics* 23(3):381–382.
2. Lingel A, Simon B, Izaurralde E, Sattler M (2005) The structure of the flock house virus B2 protein, a viral suppressor of RNA interference, shows a novel mode of double-stranded RNA recognition. *EMBO Rep* 6(12):1149–1155.

3. Zwahlen C, et al. (1997) Methods for measurement of intermolecular NOEs by multinuclear NMR Spectroscopy: Application to a bacteriophage λ N-peptide/boxB RNA complex. *J Am Chem Soc* 119(29):6711–6721.





**Table S1. Summary of Sgt2\_NT dimer solution structural statistics.**

| Ensemble (20 structures)             |                         |
|--------------------------------------|-------------------------|
| Distance and dihedral restraints     |                         |
| NOEs                                 |                         |
| Intraresidue                         | 974                     |
| Sequential                           | 512                     |
| Medium range                         | 416                     |
| Long range                           | 414                     |
| Intermonomer                         | 244                     |
| Total unambiguous                    | 2,560                   |
| Ambiguous                            | 1,092                   |
| Total NOE-derived                    | 3,652                   |
| Hydrogen bond restraints*            | 58 (29 H-bonds)         |
| Dihedral angles ( $\varphi + \psi$ ) | 102 (51 residues)       |
| Structural statistics                |                         |
| Ramachandran Plot (%) <sup>†</sup>   |                         |
| Most favored                         | 90.1                    |
| Additionally allowed                 | 8.8                     |
| Generously allowed                   | 0.4                     |
| Disallowed                           | 0.6                     |
| RMSD from experimental restraints    |                         |
| Distances (Å)                        | 0.011 ± 0.001           |
| Dihedrals (°)                        | 0.132 ± 0.124           |
| RMSD from idealized geometry         |                         |
| Bonds (Å)                            | 0.0029 ± 0.0001         |
| Angles (°)                           | 0.412 ± 0.0013          |
| Impropers (°)                        | 1.096 ± 0.0086          |
| NOE violations                       |                         |
| > 0.5 Å                              | 0 ± 0                   |
| > 0.3 Å                              | 0.3 ± 0.7               |
| > 0.1 Å                              | 11 ± 2.9                |
| Structural precision                 |                         |
| RMSD from average structure (Å)      |                         |
| Backbone (all/2ndary structure)      | 0.99 ± 0.17/0.40 ± 0.07 |
| Heavyatom (all/2ndary structure)     | 0.85 ± 0.06/1.46 ± 0.20 |

\*Applied to each monomer.

<sup>†</sup>From Procheck-NMR.

**Table S2. Summary of Get5\_UBL data collection and refinement statistics**

|                                          |                                                                   |
|------------------------------------------|-------------------------------------------------------------------|
| X-ray source                             | Diamond I02                                                       |
| Data processing                          | Mosflm/Scala                                                      |
| Space group                              | P 3 <sub>2</sub> 2 1                                              |
| Unit-cell parameters                     | a = b = 47.190 Å<br>c = 78.410 Å<br>α = β = 90.00°<br>γ = 120.00° |
| Wavelength/Å                             | 0.97950                                                           |
| Resolution/Å                             | 40.9–1.78 (1.88–1.78)                                             |
| Measured reflections                     | 78,172 (11,244)                                                   |
| Unique reflections                       | 10,128 (1,441)                                                    |
| Mn(I/sd)                                 | 20.8 (5.13)                                                       |
| Completeness (%)                         | 99.8 (100.0)                                                      |
| Multiplicity                             | 7.72 (7.80)                                                       |
| R <sub>meas</sub> (%)                    | 0.06 (0.37)                                                       |
| Solvent content (%)                      | 57                                                                |
| R <sub>work</sub> /R <sub>free</sub> (%) | 20.1/24.8                                                         |
| Protein atoms                            | 894                                                               |
| Solvent atoms                            | 131                                                               |
| RMSD from ideal                          |                                                                   |
| Bond lengths (Å)                         | 0.024                                                             |
| Bond angles (°)                          | 1.987                                                             |
| Average B factor (Å <sup>2</sup> )       | 24.1                                                              |
| Ramachandran favored region (%)          | 98.72                                                             |
| Ramachandran outlier region (%)          | 0                                                                 |

**Table S3. ITC results for Sgt2\_NT mutants binding to Get5\_UBD**

| Construct | K <sub>a</sub> (mol <sup>-1</sup> ) | ΔH (kCal/mol) | ΔS (cal/mol/Δdeg) | N   | K <sub>d</sub> (μM) | Relative affinity loss |
|-----------|-------------------------------------|---------------|-------------------|-----|---------------------|------------------------|
| WT        | 9.2 × 10 <sup>6</sup>               | -12.7         | -8.7              | 1.1 | 0.11                | 1                      |
| F16Y      | 6.5 × 10 <sup>6</sup>               | -11           | -5.1              | 1.4 | 0.15                | 1                      |
| D31R      | 2.5 × 10 <sup>5</sup>               | -3.7          | +12.4             | 0.8 | 4.0                 | 36×                    |
| V35A      | 2.5 × 10 <sup>5</sup>               | -13.2         | +13.7             | 1.3 | 4.0                 | 36×                    |
| D38R      | ND*                                 | ND            | ND                | ND  | ND                  | >100× <sup>†</sup>     |
| E42R      | 6 × 10 <sup>5</sup>                 | -13.4         | -17.6             | 0.8 | 1.7                 | 15×                    |

\*Not detected by ITC.

<sup>†</sup>Lower limit for the loss of affinity.
